# Supplementary material for: Deep proteome profiling of human mammary epithelia at lineage and age resolution
Source: PubMed Central journal article supplement — iScience. 2021 Aug 23;24(9):103026. doi: 10.1016/j.isci.2021.103026 (PMC8426267; doi:10.1016/j.isci.2021.103026), 2021-08-23
Supplement: mmc1.pdf [file mmc1.pdf]

**iScience, Volume 24**

**Supplemental information**

**Deep proteome profiling of human mammary  
epithelia at lineage and age resolution**

**Stefan Hinz, Antigoni Manousopoulou, Masaru Miyano, Rosalyn W. Sayaman, Kristina Y. Aguilera, Michael E. Todhunter, Jennifer C. Lopez, Lydia L. Sohn, Leo D. Wang, and Mark A. LaBarge**

# Supplemental Figure S1

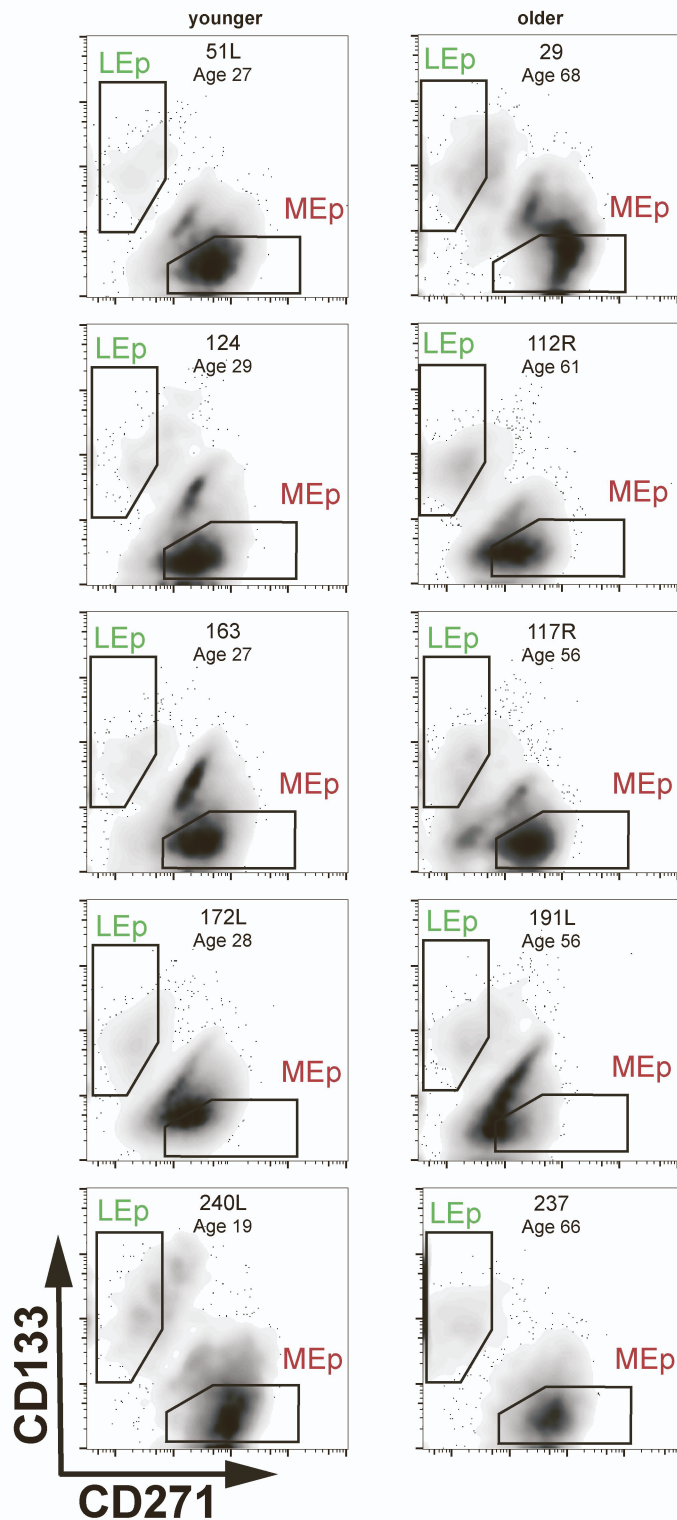

FACS plot of HMEC sorting. Representative FACS plots of MEp cell marker CD271 and LEp cell marker CD133 for analyzed HMECs.
